# Supplementary material for: Applications of Artificial Intelligence in Emergency Departments to Improve Wait Times: Protocol for an Integrative Living Review
Source: PubMed Central journal article supplement (PMC11053385; doi:10.2196/52612), 2024-04-12
Supplement: resprot_v13i1e52612_app1.pdf [file resprot_v13i1e52612_app1.pdf]

Ovid MEDLINE(R) and Epub Ahead of Print, In-Process, In-Data-Review & Other Non-Indexed Citations and Daily <1946 to August 17, 2023>

- 1 exp Artificial Intelligence/ 177295
- 2 (artificial intelligence or deep learning or machine learning or fuzzy logic or machine intelligence).tw,kf. 156136
- 3 exp Emergency Medical Services/ 169557
- 4 (ER or ED).tw,kf. 191941
- 5 ((urgent care or emergency) adj2 (room\* or service\* or department\*)).tw,kf. 168894
- 6 3 or 4 or 5 403147
- 7 exp "appointments and schedules"/ 23000
- 8 (wait\* time\* or efficien\* or schedul\* or predict\*).tw,kf. 3424366
- 9 (patient flow or work flow or work design or workflow).tw,kf. 394
- 43
- 10 (physician initial assessment or PIA or left without being seen or LWBS or length of stay or LOS).tw,kf. 135237
- 11 7 or 8 or 9 or 10 3575965
- 12 (natural language process\* or computer vision or robotic\* or neural network\* or generative adversarial network\* or image classification or object detection or image processing or case-based reasoning or game playing or transformer\* or swarm intelligence or gradient descent or simulated annealing or decision tree\* or random forest\* or support vector machines or k-nearest neighbor\* or k-nearest neighbour\* or naive bayes or gradient boosting machines or xgboost or tokenization or policy gradient method\* or autoregressive integrated moving average or support vector machine\* or Bayesian network\* or k-mean\* or hierarchical cluster\* or association rule mining).tw,kf. 191518

13 ((Data or text) adj1  
mining).tw,kf. 18021

14 ((supervised or unsupervised or transfer or semi-supervised or active) adj1  
learning).tw,kf. 17382

15 (AI or CNN or RNN or GAN or NER or SGD or GA or PPO or BERT or GPT or ARIMA or  
SARIMA or SVM or DBSCAN).tw,kf. 159718

16 ((named entity or speech) adj1  
recognition).tw,kf. 5877

17 ((expert or rule-based or fuzzy or knowledge-based or decision support) adj1  
systems).tw,kf. 6706

18 ((evolutionary or cognitive) adj1  
computing).tw,kf. 226

19 ((ant colony or particle swarm or proximal policy) adj1  
optimization).tw,kf. 3873

20 ((genetic or simplex or apriori) adj1  
algorithm).tw,kf. 9343

21 ((linear or logistic) adj1  
regression).tw,kf. 533643

22 1 or 2 or 12 or 13 or 14 or 15 or 16 or 17 or 18 or 19 or 20 or  
21 1040557

23 6 and 11 and  
22 9895
